# Supplementary material
Source: PubMed Central journal article supplement (PMC3696658)
Supplement: supp_M113.451112_jbc.M113.451112-1.pdf [file supp_M113.451112_jbc.M113.451112-1.pdf]

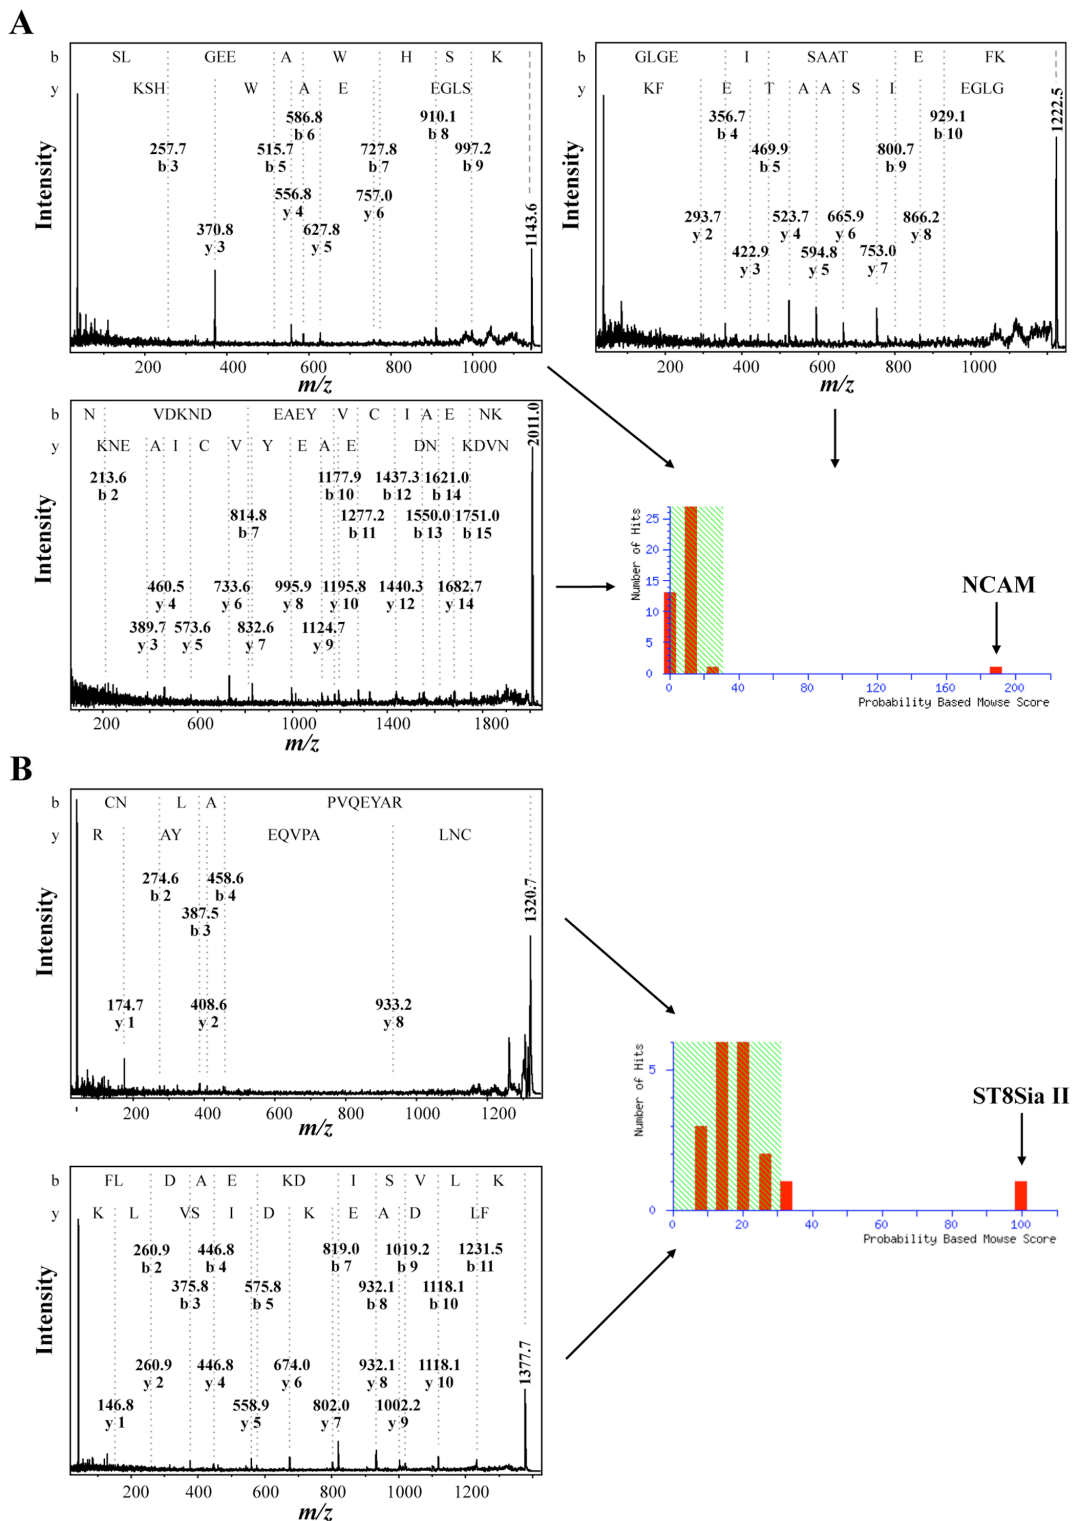

**Fig. S1. Identification of polysialylated NCAM and ST8SiaII by fragmentation analysis.** Fragmentation analyses of peptide signals at  $m/z$  1143.6, 1225.5 and 2011.0 in the case of (A) NCAM and at  $m/z$  1377.7 and 1320.7 for (B) ST8SiaII were performed. Sequence-specific ions are labeled and the corresponding amino acid sequences are shown. Monoisotopic masses of the pseudomolecular ions  $[M+H]^+$  are given. Database searches (mascot) revealed NCAM and ST8SiaII as the polySia carriers with a significant score (inset). Sequence-specific ions are labeled according to previous studies (44, 45).
