# Supplementary material
Source: PubMed Central journal article supplement (PMC3696658)
Supplement: supp_M113.451112_jbc.M113.451112-2.pdf [file supp_M113.451112_jbc.M113.451112-2.pdf]

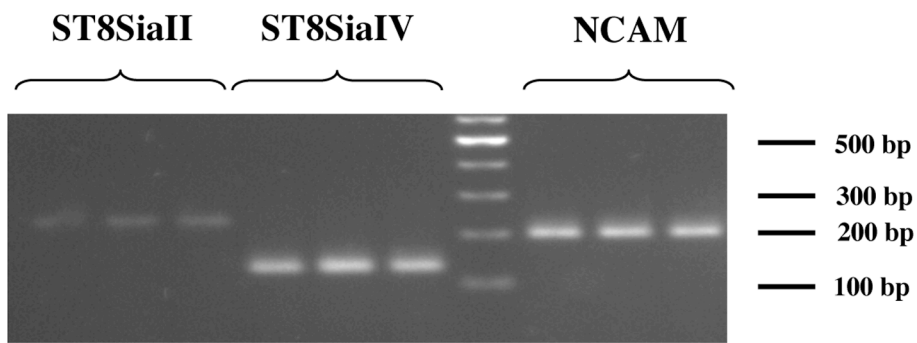

**Fig. S2. mRNA analyses of ST8SiaII, ST8SiaIV and NCAM in rat epididymidis.** Gene transcripts of polysialyltransferases ST8SiaII and ST8SiaIV as well as NCAM were analyzed by RT-PCR and the amplified products were separated by gel electrophoresis using 2% agarose gel.
